# Supplementary material
Source: PubMed Central journal article supplement (PMC6645198)
Supplement: Supp_Table1.pdf [file Supp_Table1.pdf]

## Supplementary Data

SUPPLEMENTARY TABLE S1. ESTIMATED ODDS RATIOS FROM LOGISTIC REGRESSION  
MODELS PREDICTING DIABETES RISK BY SEX ( $n = 7840$ )

|                                        | <i>Female</i>  |          | <i>Male</i>    |          |
|----------------------------------------|----------------|----------|----------------|----------|
|                                        | <i>OR (SE)</i> | <i>p</i> | <i>OR (SE)</i> | <i>p</i> |
| Sexual orientation (ref: heterosexual) |                |          |                |          |
| Sexual minority in adolescence only    | 1.010 (0.423)  | 0.982    | 1.495 (0.437)  | 0.169    |
| Sexual minority in adulthood only      | 1.345 (0.348)  | 0.650    | 1.878 (0.671)  | 0.120    |
| Sexual minority in both stages         | 2.157 (0.640)* | 0.010    | 1.008 (0.586)  | 0.990    |

All models controlled for age, race/ethnicity, parents' education, and family structure at Wave I as well as personal income, college degree, body mass index, current daily smoker, drinking frequency, number of drugs used, and depressive symptoms at Wave IV.

\* $p < 0.05$ .

OR, odds ratio; SE, standard error.
